# Supplementary material
Source: PubMed Central journal article supplement (PMC153625)

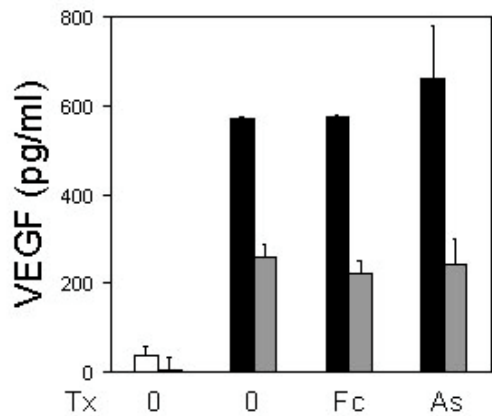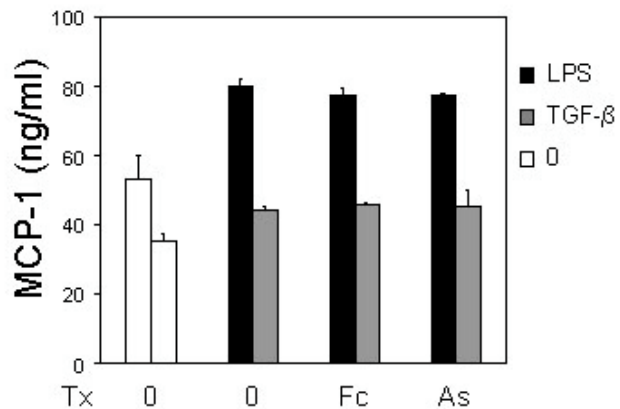

Supplement: pnas_0730843100_3.pdf [file pnas_0730843100_3.pdf]
